# Supplementary material for: Combination NIPS/TIPS Synthesis of α-Fe2O3 and α/γ-Fe2O3 Doped PVDF Composite for Efficient Piezocatalytic Degradation of Rhodamine B
Source: MDPI journal article supplement (doi:10.3390/molecules28196932), 2023-10-04
Supplement: s1 [file s1]

# Combination NIPS/TIPS Synthesis of $\alpha$ -Fe<sub>2</sub>O<sub>3</sub> and $\alpha/\gamma$ -Fe<sub>2</sub>O<sub>3</sub> doped PVDF Composite for Efficient Piezocatalytic Degradation of Rhodamine B

A.G. Magomedova <sup>1</sup>, A.A. Rabadanova <sup>1</sup>, A.O. Shuaibov <sup>1</sup>, D.A. Selimov <sup>1</sup>, D.S. Sobola <sup>2,\*</sup>, K. Rabadanov <sup>2</sup>, K.M. Giraev <sup>1</sup> and F.F. Orudzhev <sup>1,3,\*</sup>

<sup>1</sup> Smart Materials laboratory, Department of Inorganic Chemistry and Chemical Ecology, Dagestan State University, St. M. Gadjieva 43-a, Dagestan Republic, 367015 Makhachkala, Russia

<sup>2</sup> Department of Physics, Faculty of Electrical Engineering and Communication, Brno University of Technology, Technicka 10, 616 00 Brno, Czech Republic

<sup>3</sup> Amirkhanov Institute of Physics of Dagestan Federal Research Center, Russian Academy of Sciences, 367003 Makhachkala, Russia

\* Correspondence: farid-stkha@mail.ru

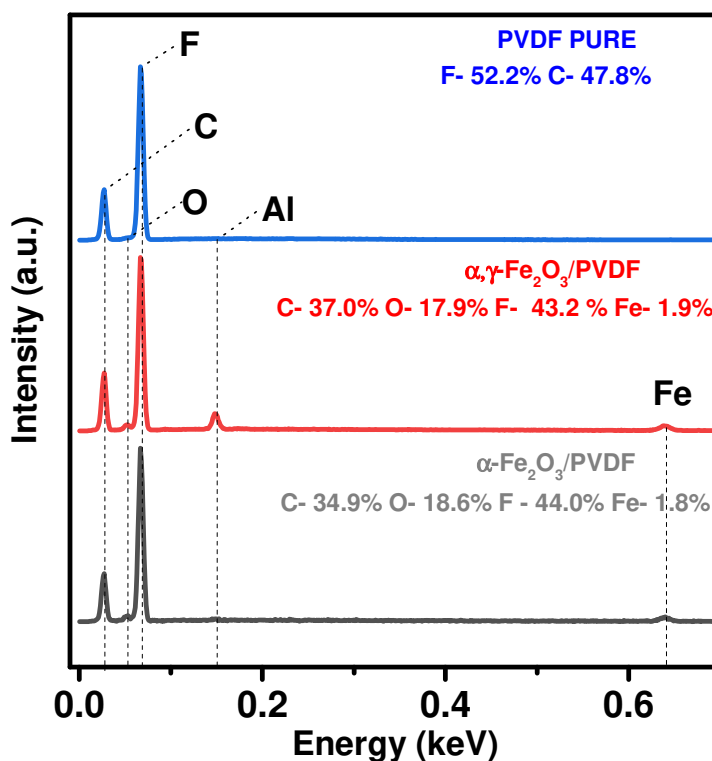

Figure S1. EDX spectra of samples

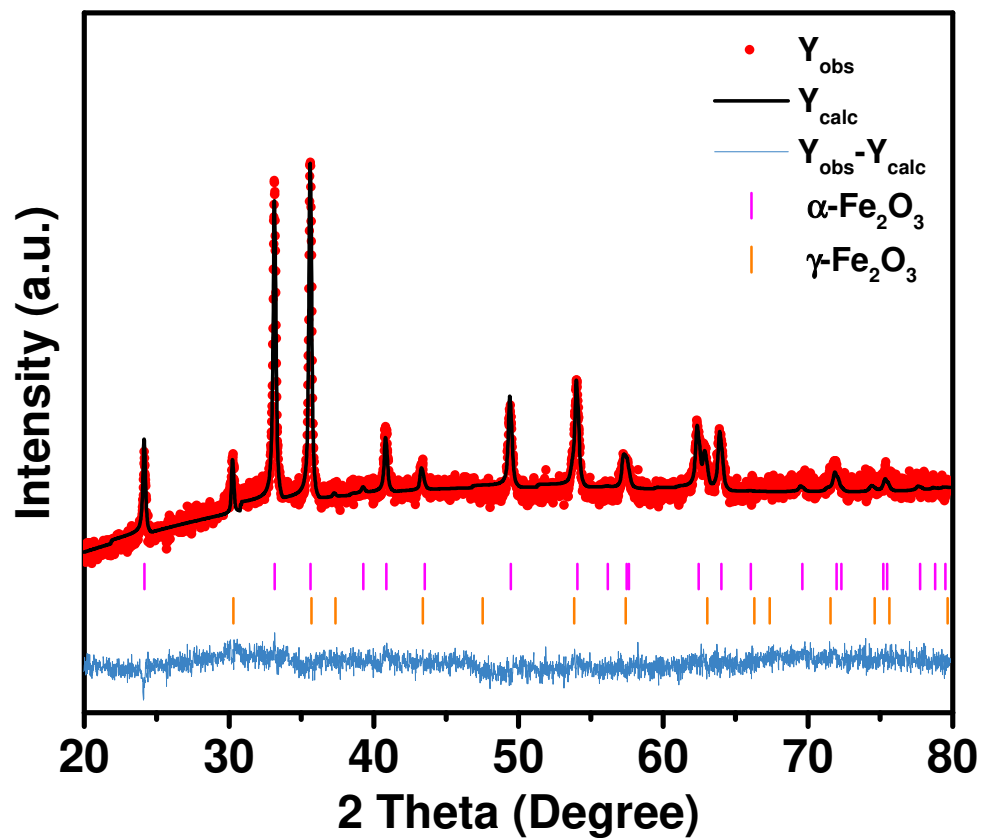

Figure S2. XRD patterns of  $\alpha\text{-Fe}_2\text{O}_3$  and  $\alpha,\gamma\text{-Fe}_2\text{O}_3$  with standards.

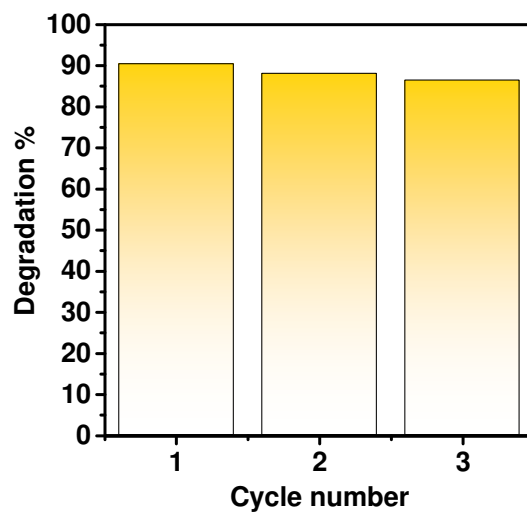

Figure S3. Cycling tests of the  $\alpha\text{-Fe}_2\text{O}_3/\text{PVDF}$  membrane in the degradation of RhB.

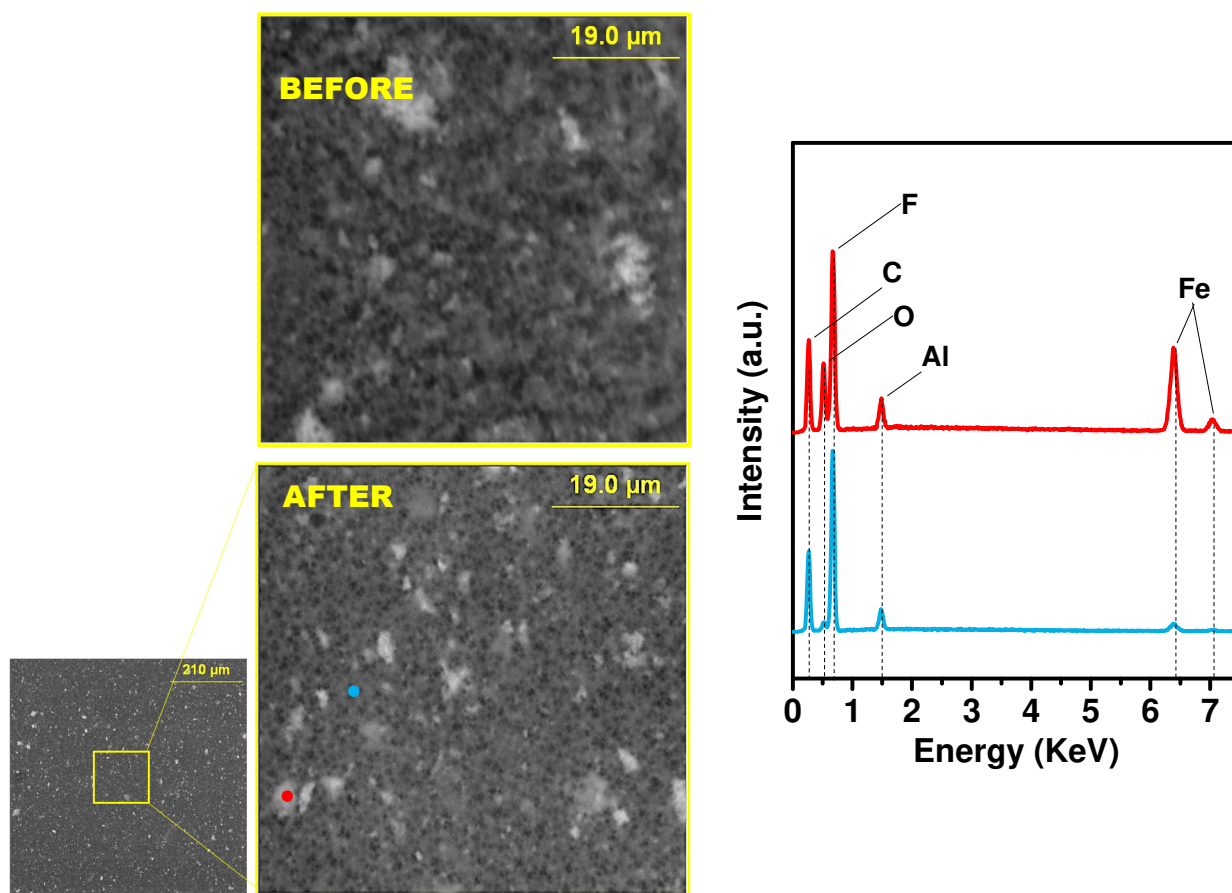

**Figure S4.** SEM images of  $\alpha$ -Fe<sub>2</sub>O<sub>3</sub>/PVDF before and after 3 cycles piezocatalytic experiment and selected area EDX spectra

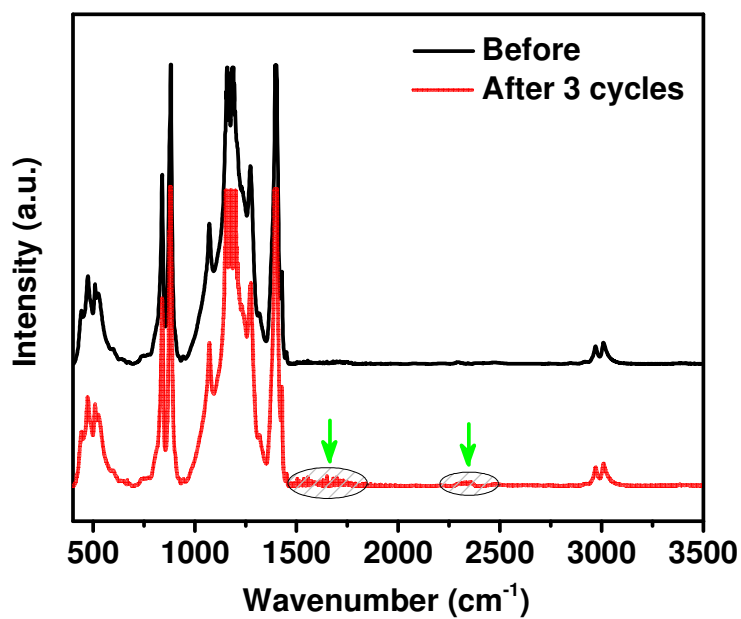

**Figure S5.** FTIR spectra of  $\alpha$ -Fe<sub>2</sub>O<sub>3</sub>/PVDF before and after 3 cycles piezocatalytic experiment.

**Table. S1. Previously reported work and its comparison with our present work in field Piezocatalytic properties of PVDF based composites.**

| Materials                                                                                    | Pollutants                                        | Time (min) | Mechanical source                                      | Degradation, % | Rate constant, min <sup>-1</sup> | References |
|----------------------------------------------------------------------------------------------|---------------------------------------------------|------------|--------------------------------------------------------|----------------|----------------------------------|------------|
| E-MoS <sub>2</sub> /PVD<br>F EFMs<br>10 wt %<br><br>100 mg                                   | OTC<br>C= 20 mg/L<br>V= 100 mL                    | 24         | US<br>v= 20 kHz                                        | 93.05          | 0.09124                          | 1          |
| Ag@LiNbO <sub>3</sub> /PVDF<br>5 wt %<br>2.5 cm<br>Diameter                                  | Rhodamine B<br><br>C= 5 mg/L<br>V= 10 mL          | 120        | Ultrasonicator<br>W= 70 W<br>v= 40 kHz                 | ~80            | -                                | 2          |
| CBO/PVDF<br>(1:1 mass)<br>?                                                                  | Rhodamine B<br><br>C=10 mg·L <sup>-1</sup><br>V=? | 10         | Ultrasonic instrument<br><br>W = 100 W                 | 99.9           | -                                | 3          |
| MoS <sub>2</sub> -<br>PVDF<br>10 wt%<br>2×2 cm <sup>2</sup><br>thickness<br>50 μm            | Rhodamine B<br><br>C= 10 ppm<br>V= 10 mL          | 20         | RS<br>Pro Ultrasonic<br>Cleaner<br><br>W=100 W         | >90            | 0.21                             | 4          |
| PVDF/ZnS<br>nO <sub>3</sub> /MoS <sub>2</sub><br>20 wt %<br>?                                | MB<br><br>C= 5 mg/L<br>V=?                        | 4          | Ultrasonicator<br><br>W= 50 W<br>v= 40 kHz             | 100            | -                                | 5          |
| BTO-PDMS<br><br>(25 wt %)<br>?                                                               | Rhodamine B<br><br>C= 5 mg/L<br>V= 40 mL          | 120        | Ultrasonic machine<br><br>W= 400W<br>v= 40 kHz         | ~94            | 0.02254                          | 6          |
| CNT/PVDF<br>(SCP,<br>0.015 g)                                                                | Rhodamine B<br>C= 5 mg/L<br>V= 15 mL              | 120        | US<br><br>W= 240 W                                     | ≥ 95           | -                                | 7          |
| Bi <sub>2</sub> ZnB <sub>2</sub> O <sub>7</sub> -<br>Polyacrylo<br>nitrile<br>(BBZO-<br>PAN) | MB<br>C= 5 mg/L<br>V= 10 mL                       | 180        | Ultrasonicator<br>(Labman)<br><br>W=150 W<br>v= 40 kHz | 37             | 2.1*10 <sup>-3</sup>             | 8          |

|                                                                                                         |                                               |    |                                  |    |       |           |
|---------------------------------------------------------------------------------------------------------|-----------------------------------------------|----|----------------------------------|----|-------|-----------|
| 1.5×1.5 cm <sup>2</sup>                                                                                 |                                               |    |                                  |    |       |           |
| α-<br>Fe <sub>2</sub> O <sub>3</sub> /PVD<br>F<br>(2wt%)<br>3×1 cm <sup>2</sup><br>thickness<br>~110 μm | Rhodamine<br>B (RhB)<br>C= 8 mg/L<br>V= 20 mL | 60 | US bath<br><br>W=120 W<br>40 KHz | 90 | 0.036 | This work |

1. Ma, W., Yao, B., Zhang, W., He, Y., Yu, Y., & Niu, J. (2021). Fabrication of PVDF-based piezocatalytic active membrane with enhanced oxytetracycline degradation efficiency through embedding few-layer E-MoS<sub>2</sub> nanosheets. *Chemical Engineering Journal*, 415, 129000.
2. Singh, G., Sharma, M., & Vaish, R. (2021). Flexible Ag@ LiNbO<sub>3</sub>/PVDF composite film for piezocatalytic dye/pharmaceutical degradation and bacterial disinfection. *ACS Applied Materials & Interfaces*, 13(19), 22914-22925.
3. Liao, X., Chen, X., Tang, Y., Zhu, M., Xie, H., Xin, Y., ... & Fan, X. (2022). Enhanced Piezocatalytic Reactive Oxygen Species Production Activity and Recyclability of the Dual Piezoelectric Cu<sub>3</sub>B<sub>2</sub>O<sub>6</sub>/PVDF Composite Membrane. *ACS Applied Materials & Interfaces*, 15(1), 1286-1295.
4. Bagchi, B., Hoque, N. A., Janowicz, N., Das, S., & Tiwari, M. K. (2020). Re-usable self-poled piezoelectric/piezocatalytic films with exceptional energy harvesting and water remediation capability. *Nano Energy*, 78, 105339.
5. Veeralingam, S., & Badhulika, S. (2023). Rapid Degradation of Organic Dyes via Ultrasound Triggered Piezo-Catalysis Using PVDF/ZnSnO<sub>3</sub>/MoS<sub>2</sub> Nanocomposite. *ACS Applied Nano Materials*.
6. Qian, W., Zhao, K., Zhang, D., Bowen, C. R., Wang, Y., & Yang, Y. (2019). Piezoelectric material-polymer composite porous foam for efficient dye degradation via the piezo-catalytic effect. *ACS applied materials & interfaces*, 11(31), 27862-27869.
7. Liu, C., Xu, H., Huo, B., Wang, J., Wang, Z., Chen, X., ... & Wang, Y. (2023). Research progress of PVDF based piezoelectric polymer composites in water pollution remediation. *Journal of Water Process Engineering*, 55, 104181.
8. Porwal, C., Verma, S., Chauhan, V. S., & Vaish, R. (2023). Bismuth zinc borate-Polyacrylonitrile nanofibers for photo-piezocatalysis. *Journal of Industrial and Engineering Chemistry*, 124, 358-367.
